# Supplementary material for: BMI in early adulthood is associated with severe COVID‐19 later in life: A prospective cohort study of 1.5 million Swedish men
Source: PubMed Central journal article supplement — Obesity (Silver Spring). 2022 Feb 15;30(3):779–87. doi: 10.1002/oby.23378 (PMC9304214; doi:10.1002/oby.23378), 2022-02-15
Supplement: OBY-30-779-s001.pdf [file OBY-30-779-s001.pdf]

# Supplemental Material

This appendix has been provided by the authors to give readers additional information about their work.

**Supplement to:**

BMI in early adulthood is associated with severe COVID-19 later in life – a prospective cohort study of 1.5 million Swedish men

Josefina Robertson, Martin Adiels, Lauren Lissner, Kirsten Mehlig, Agnes af Geijerstam, Martin Lindgren, Magnus Gisslén, Elin Ekblom Bak, Annika Rosengren, Maria Åberg

## Supplemental Material

# BMI in early adulthood is associated with severe COVID-19 later in life – a prospective cohort study of 1.5 million Swedish men

### Running title:

BMI in youth and severe COVID-19

### Authors:

Josefina Robertson<sup>1,2,3</sup>, MD, PhD; Martin Adiels<sup>4</sup>, PhD; Lauren Lissner<sup>2</sup>, MD, PhD; Kirsten Mehlig<sup>2</sup>, PhD; Agnes af Geijerstam<sup>2</sup>, MD; Martin Lindgren<sup>3,4</sup>, MD, PhD; Magnus Gisslén<sup>1,3</sup>, MD, PhD; Elin Ekblom Bak<sup>5</sup>, PhD; Annika Rosengren<sup>3,4</sup>, MD, PhD; Maria Åberg<sup>2,6</sup>, MD, PhD.

### Affiliations:

<sup>1</sup>Department of Infectious Diseases, Institute of Biomedicine, Sahlgrenska Academy, University of Gothenburg, Gothenburg, Sweden

<sup>2</sup>School of Public Health and Community Medicine, Institute of Medicine, Sahlgrenska Academy, University of Gothenburg, Gothenburg, Sweden

<sup>3</sup>Region Västra Götaland, Sahlgrenska University Hospital, Gothenburg, Sweden

<sup>4</sup>Department of Molecular and Clinical Medicine, Institute of Medicine, Sahlgrenska Academy, University of Gothenburg, Gothenburg, Sweden

<sup>5</sup>The Swedish School of Sport and Health Sciences, Department of Physical Activity and Health, Stockholm, Sweden

<sup>6</sup>Region Västra Götaland, Regionhälsan, Gothenburg, Sweden

### Corresponding author

Josefina Robertson, Department of Infectious Diseases, Sahlgrenska University Hospital, SE-416 85, Gothenburg, Sweden  
Email: josefina.robertson@gu.se

# Table of contents

## Supplemental tables

|                                                                                                                                                                                      |    |
|--------------------------------------------------------------------------------------------------------------------------------------------------------------------------------------|----|
| <b>Table S1.</b> List of included principal diagnoses among cases with COVID-19 (U07.1 or U07.2) as a secondary diagnosis in the National Patient Register (n = 272).                | 4  |
| <b>Table S2.</b> Diagnostic codes for preexisting comorbidities from the International Classification of Diseases (ICD).                                                             | 6  |
| <b>Table S3.</b> Odds ratios (OR) and 95% confidence intervals (CI) for severe COVID-19 by body mass index (BMI) category in 1,551,670 young Swedish men born 1950-1987.             | 7  |
| <b>Table S4.</b> Descriptive data of 4,315 patients with severe COVID-19 leading to hospital admission divided by the first and second wave of the pandemic in 2020 in Sweden.       | 10 |
| <b>Table S5.</b> Descriptive data of 151,603 conscripts with additional information on BMI in middle age [mean age 45.2 (10.1) years] through the Health Profile Institute (HPI) AB. | 12 |

## Supplemental figures

|                                                                                                                                                                                                                                                           |    |
|-----------------------------------------------------------------------------------------------------------------------------------------------------------------------------------------------------------------------------------------------------------|----|
| <b>Figure S1.</b> Flowchart of included and excluded men.                                                                                                                                                                                                 | 14 |
| <b>Figure S2.</b> Proportions of BMI groups in hospitalized patients with COVID-19 by week during the pandemic in 2020.                                                                                                                                   | 15 |
| <b>Figure S3.</b> Correlation between body mass index (BMI) at conscription [mean age 18.3 (SD 0.6) years] and at measurement in middle age [mean age 45.2 (SD 10.1) years] through the Health Profile Institute (HPI) AB for 151,603 Swedish conscripts. | 16 |

## Supplemental tables

**Table S1.** List of included principal diagnoses among cases with COVID-19 (U07.1 or U07.2) as a secondary diagnosis in the National Patient Register (n = 272).

| Included categories                                                       | ICD-codes |
|---------------------------------------------------------------------------|-----------|
| <b>COVID-related symptoms</b>                                             |           |
| Cough                                                                     | R05       |
| Abnormalities of breathing                                                | R06       |
| Pain in throat and chest                                                  | R07       |
| Other symptoms and signs involving the circulatory and respiratory system | R09       |
| Dizziness and giddiness                                                   | R42       |
| Fever of other or unknown origin                                          | R50       |
| Headache                                                                  | R51       |
| Malaise and fatigue                                                       | R53       |
| Syncope and collapse                                                      | R55       |
| <b>Upper and lower respiratory tract infections</b>                       |           |
| Acute nasopharyngitis                                                     | J00       |
| Acute tonsillitis                                                         | J03       |
| Acute upper respiratory infections of multiple and unspecified sites      | J06       |
| Influenza due to other identified influenza virus                         | J10       |
| Other viral pneumonia                                                     | J128      |
| Viral pneumonia, unspecified                                              | J129      |
| Pneumonia due to <i>Streptococcus pneumoniae</i>                          | J13       |
| Bacterial pneumonia, not elsewhere classified                             | J15       |
| Pneumonia due to other specified infectious organisms                     | J168      |
| Pneumonia in diseases classified elsewhere                                | J17       |
| Pneumonia, unspecified organism                                           | J18       |
| Unspecified acute lower respiratory infection                             | J22       |
| Coronavirus infection, unspecified                                        | B342      |
| Other viral infections of unspecified site                                | B348      |
| Viral infection, unspecified                                              | B349      |
| Coronavirus as the cause of diseases classified elsewhere                 | B972      |
| Other and unspecified infectious diseases                                 | B99       |
| <b>Respiratory disorders</b>                                              |           |
| Pulmonary embolism                                                        | I26       |
| Acute respiratory distress syndrome                                       | J80       |
| Pulmonary edema                                                           | J81       |
| Pleural effusion not elsewhere classified                                 | J90       |
| Respiratory failure, not elsewhere classified                             | J96       |
| Respiratory disorders in diseases classified elsewhere                    | J99       |
| <b>Obstructive Airway Diseases</b>                                        |           |
| Acute bronchitis due to other specified organisms                         | J208      |
| Acute bronchitis, unspecified                                             | J209      |
| Acute bronchiolitis due to other specified organisms                      | J218      |
| Acute bronchiolitis, unspecified                                          | J219      |
| Other chronic obstructive pulmonary disease                               | J44       |

|                                                             |      |
|-------------------------------------------------------------|------|
| Asthma                                                      | J45  |
| <b>Cardiac diseases</b>                                     |      |
| Viral carditis                                              | B332 |
| Chronic ischemic heart disease                              | I25  |
| Acute pericarditis                                          | I30  |
| Pericarditis in diseases classified elsewhere               | I32  |
| Acute myocarditis, unspecified                              | I40  |
| Myocarditis in diseases classified elsewhere                | I41  |
| Atrial fibrillation and flutter                             | I48  |
| Heart failure                                               | I50  |
| Abnormalities of heart beat                                 | R00  |
| <b>Kidney disorders</b>                                     |      |
| Acute kidney failure                                        | N17  |
| Chronic kidney disease                                      | N18  |
| Unspecified kidney failure                                  | N19  |
| <b>Electrolyte disorders</b>                                |      |
| Other disorders of fluid, electrolyte and acid-base balance | E87  |

**Table S2.** Diagnostic codes for preexisting comorbidities from the International Classification of Diseases (ICD).

| <b>Diagnosis</b>                      | <b>ICD-8</b>   | <b>ICD-9</b> | <b>ICD-10</b> |
|---------------------------------------|----------------|--------------|---------------|
| Cancer                                | 140–209        | 140–208      | C00–97        |
| Chronic obstructive pulmonary disease | 490–492        | 490–492, 496 | J40–44        |
| Coronary heart disease                | 410–414        | 410–414      | I20–25        |
| Diabetes mellitus                     | 250            | 250          | E10–14        |
| Heart failure                         | 427.00, 427.10 | 428          | I50           |
| Hypertension                          | 401–405        | 401–405      | I10–15        |
| Obesity                               | -              | 278          | E66           |

**Table S3.** Odds ratios (OR) and 95% confidence intervals (CI) for severe COVID-19 by body mass index (BMI) category in 1,551,670 young Swedish men born 1950-1987.

|                                                                     | OR (95% CI)          |                      |
|---------------------------------------------------------------------|----------------------|----------------------|
|                                                                     | Model 1 <sup>a</sup> | Model 2 <sup>a</sup> |
| <b>COVID-19 (admitted to hospital, n = 4,315)</b>                   |                      |                      |
| BMI 15–18.5                                                         | 1.05 (0.93–1.20)     | 1.06 (0.93–1.20)     |
| BMI 18.5–20 (reference)                                             | 1                    | 1                    |
| BMI 20–22.5                                                         | 1.08 (0.99–1.18)     | 1.06 (0.97–1.16)     |
| BMI 22.5–25                                                         | 1.29 (1.17–1.42)     | 1.19 (1.08–1.31)     |
| BMI 25–30                                                           | 1.83 (1.64–2.05)     | 1.52 (1.36–1.70)     |
| BMI ≥30                                                             | 2.36 (1.96–2.83)     | 1.68 (1.39–2.02)     |
| Age in 2020, years                                                  | 1.05 (1.05–1.05)     | 1.04 (1.03–1.04)     |
| Hypertension <sup>b</sup>                                           |                      | 1.82 (1.66–1.98)     |
| Diabetes mellitus type 1 <sup>b</sup>                               |                      | 1.43 (1.05–1.95)     |
| Diabetes mellitus type 2 <sup>b</sup>                               |                      | 1.96 (1.79–2.15)     |
| Coronary heart disease <sup>b</sup>                                 |                      | 0.94 (0.82–1.07)     |
| Heart failure <sup>b</sup>                                          |                      | 1.92 (1.62–2.26)     |
| <b>COVID-19 (admitted to an intensive care unit, n = 729)</b>       |                      |                      |
| BMI 15–18.5                                                         | 1.31 (0.97–1.78)     | 1.31 (0.97–1.78)     |
| BMI 18.5–20 (reference)                                             | 1                    | 1                    |
| BMI 20–22.5                                                         | 1.13 (0.90–1.41)     | 1.10 (0.88–1.38)     |
| BMI 22.5–25                                                         | 1.57 (1.23–2.00)     | 1.44 (1.13–1.84)     |
| BMI 25–30                                                           | 2.54 (1.94–3.32)     | 2.04 (1.56–2.68)     |
| BMI ≥30                                                             | 3.87 (2.58–5.79)     | 2.61 (1.73–3.93)     |
| Age in 2020, years                                                  | 1.07 (1.07–1.08)     | 1.06 (1.05–1.07)     |
| Hypertension <sup>b</sup>                                           |                      | 1.93 (1.58–2.35)     |
| Diabetes mellitus type 1 <sup>b</sup>                               |                      | 0.41 (0.10–1.66)     |
| Diabetes mellitus type 2 <sup>b</sup>                               |                      | 2.15 (1.75–2.64)     |
| Coronary heart disease <sup>b</sup>                                 |                      | 0.66 (0.47–0.93)     |
| Heart failure <sup>b</sup>                                          |                      | 1.45 (0.96–2.20)     |
| <b>COVID-19 (requiring high-flow nasal oxygen therapy, n = 849)</b> |                      |                      |
| BMI 15–18.5                                                         | 1.10 (0.82–1.46)     | 1.10 (0.83–1.47)     |
| BMI 18.5–20 (reference)                                             | 1                    | 1                    |
| BMI 20–22.5                                                         | 1.04 (0.85–1.28)     | 1.02 (0.83–1.25)     |
| BMI 22.5–25                                                         | 1.47 (1.19–1.84)     | 1.34 (1.08–1.67)     |
| BMI 25–30                                                           | 2.11 (1.64–2.70)     | 1.67 (1.30–2.15)     |

|                                                                                                            |                  |                  |
|------------------------------------------------------------------------------------------------------------|------------------|------------------|
| BMI $\geq$ 30                                                                                              | 2.95 (1.95–4.30) | 1.94 (1.30–2.90) |
| Age in 2020, years                                                                                         | 1.07 (1.06–1.07) | 1.05 (1.04–1.06) |
| Hypertension <sup>b</sup>                                                                                  |                  | 1.76 (1.45–2.13) |
| Diabetes mellitus type 1 <sup>b</sup>                                                                      |                  | 1.46 (0.72–2.93) |
| Diabetes mellitus type 2 <sup>b</sup>                                                                      |                  | 2.36 (1.95–2.86) |
| Coronary heart disease <sup>b</sup>                                                                        |                  | 0.92 (0.69–1.23) |
| Heart failure <sup>b</sup>                                                                                 |                  | 1.77 (1.23–2.53) |
| <b>Death due to COVID-19<sup>c</sup> (n = 224)</b>                                                         |                  |                  |
| BMI 15–18.5                                                                                                | 1.42 (0.89–2.27) | 1.44 (0.90–2.30) |
| BMI 18.5–20 (reference)                                                                                    | 1                | 1                |
| BMI 20–22.5                                                                                                | 0.83 (0.56–1.22) | 0.80 (0.54–1.18) |
| BMI 22.5–25                                                                                                | 1.16 (0.75–1.79) | 0.99 (0.64–1.53) |
| BMI 25–30                                                                                                  | 3.01 (1.95–4.65) | 2.10 (1.34–3.27) |
| BMI $\geq$ 30                                                                                              | 2.91 (1.23–6.87) | 1.50 (0.63–3.59) |
| Age in 2020, years                                                                                         | 1.16 (1.14–1.18) | 1.13 (1.11–1.16) |
| <b>COVID-19 among individuals younger than 55 years of age (admitted to hospital, n = 1,675)</b>           |                  |                  |
| BMI 15–18.5                                                                                                | 1.06 (0.84–1.35) | 1.06 (0.84–1.35) |
| BMI 18.5–20 (reference)                                                                                    | 1                | 1                |
| BMI 20–22.5                                                                                                | 1.09 (0.93–1.27) | 1.08 (0.92–1.26) |
| BMI 22.5–25                                                                                                | 1.44 (1.22–1.70) | 1.39 (1.18–1.63) |
| BMI 25–30                                                                                                  | 2.07 (1.73–2.47) | 1.83 (1.53–2.19) |
| BMI $\geq$ 30                                                                                              | 2.66 (2.07–3.42) | 2.02 (1.56–2.61) |
| Age in 2020, years                                                                                         | 1.08 (1.07–1.08) | 1.07 (1.06–1.07) |
| <b>COVID-19 among individuals without any cardiovascular comorbidity (admitted to hospital, n = 2,968)</b> |                  |                  |
| BMI 15–18.5                                                                                                | 1.03 (0.88–1.21) | -                |
| BMI 18.5–20 (reference)                                                                                    | 1                | -                |
| BMI 20–22.5                                                                                                | 1.11 (1.00–1.24) | -                |
| BMI 22.5–25                                                                                                | 1.27 (1.13–1.43) | -                |
| BMI 25–30                                                                                                  | 1.67 (1.45–1.92) | -                |
| BMI $\geq$ 30                                                                                              | 2.07 (1.62–2.65) | -                |
| Age in 2020, years                                                                                         | 1.04 (1.04–1.05) | -                |
| <b>COVID-19 (admitted to hospital, n = 4,315), using the US CDC BMI percentiles<sup>d</sup></b>            |                  |                  |



|                         |                  |                  |
|-------------------------|------------------|------------------|
| BMI 15–18               | 0.85 (0.74-0.99) | 0.79 (0.66-0.95) |
| BMI 18–24.5 (reference) | 1                | 1                |
| BMI 24.5–27.5           | 1.46 (1.33-1.60) | 1.30 (1.16-1.47) |
| BMI 27.5–59.2           | 2.08 (1.86-2.34) | 1.88 (1.62-2.19) |

<sup>a</sup> Model 1 is adjusted for test center and age in 2020. Model 2 is further adjusted for preexisting comorbidities (before January 1, 2020) including coronary heart disease, heart failure, hypertension, and diabetes mellitus type 1 and 2.

<sup>b</sup> Preexisting comorbidities before January 1, 2020.

<sup>c</sup> Firth’s biased reduction method was used to model COVID-19 deaths.

<sup>d</sup> Categorization by US Centers for Disease Control and Prevention (CDC) BMI percentiles.

**Table S4.** Descriptive data of 4,315 patients with severe COVID-19 leading to hospital admission divided by the first and second wave of the pandemic in 2020 in Sweden.

|                                                                            | <b>COVID-19<sup>a</sup> before Sep 1, 2020, n = 2564 (59%)</b> | <b>COVID-19<sup>a</sup> after Sep 1, 2020, n = 1751 (41%)</b> | <b>p-value</b> |
|----------------------------------------------------------------------------|----------------------------------------------------------------|---------------------------------------------------------------|----------------|
| Age at conscription, years (SD)                                            | 18.4 (0.8)                                                     | 18.5 (0.9)                                                    | p = ns         |
| Height at conscription, m (SD)                                             | 179.3 (6.9)                                                    | 179.5 (7.0)                                                   | p = ns         |
| Weight at conscription, kg (SD)                                            | 71.6 (11.9)                                                    | 71.9 (12.5)                                                   | p = ns         |
| BMI at conscription, kg/m <sup>2</sup> (SD)                                | 22.3 (3.4)                                                     | 22.0 (3.1)                                                    | p = ns         |
| Systolic blood pressure at conscription, mmHg (SD)                         | 127.8 (10.9)                                                   | 128.0 (10.8)                                                  | p = ns         |
| Diastolic blood pressure at conscription, mmHg (SD)                        | 68.9 (9.6)                                                     | 68.6 (9.6)                                                    | p = ns         |
| Age in 2020, years (SD)                                                    | 56.2 (8.9)                                                     | 56.6 (8.7)                                                    | p = ns         |
| <b>Comorbidities<sup>a</sup>, n (%)</b>                                    |                                                                |                                                               |                |
| Any comorbidity                                                            | 924 (36.0)                                                     | 649 (37.1)                                                    | p = ns         |
| Coronary heart disease                                                     | 161 (6.3)                                                      | 103 (5.9)                                                     | p = ns         |
| Heart failure                                                              | 109 (4.3)                                                      | 58 (3.3)                                                      | p = ns         |
| Hypertension                                                               | 530 (20.7)                                                     | 352 (20.1)                                                    | p = ns         |
| Diabetes mellitus type 1 <sup>b</sup>                                      | 14 (0.6)                                                       | 27 (1.5)                                                      | p < 0.01       |
| Diabetes mellitus type 2 <sup>b</sup>                                      | 396 (15.4)                                                     | 294 (16.8)                                                    | p = ns         |
| Cancer                                                                     | 3969 (2.6)                                                     | 95 (5.4)                                                      | p = ns         |
| Chronic obstructive pulmonary disease                                      | 157 (6.1)                                                      | 66 (3.8)                                                      | p = ns         |
| Obesity diagnosis                                                          | 117 (4.6)                                                      | 70 (4.0)                                                      | p = ns         |
| <b>Outcomes, n (%)</b>                                                     |                                                                |                                                               |                |
| COVID-19 admitted to an ICU <sup>c</sup>                                   | 564 (22)                                                       | 165 (9)                                                       | p < 0.001      |
| COVID-19 requiring high-flow nasal oxygen therapy in hospital <sup>a</sup> | 559 (22)                                                       | 290 (17)                                                      | p < 0.001      |
| Death due to COVID-19 <sup>d</sup>                                         | 162 (6)                                                        | 14 (0.8)                                                      | p < 0.001      |

*SD, standard deviation; BMI, body mass index; ICU, intensive care unit.*

<sup>a</sup> Diagnoses received from the National Patient Register.

<sup>b</sup> Diagnoses received from the National Diabetes Register until 2016 and from the National Patient Register from 2016.

<sup>c</sup> Diagnoses received from the Intensive Care Register.

<sup>d</sup> Diagnoses received from the Cause of Death Register.

**Table S5.** Descriptive data of 151,603 conscripts with additional information on BMI in middle age [mean age 45.2 (10.1) years] through the Health Profile Institute (HPI) AB.

|                                                       | All conscripts in the HPI, n = 151,603 (100%) | No COVID-19 admitted to hospital, n = 151,226 (99.8%) | COVID-19 admitted to hospital <sup>a</sup> , n = 377 (0.2%) | p-value   |
|-------------------------------------------------------|-----------------------------------------------|-------------------------------------------------------|-------------------------------------------------------------|-----------|
| Age at conscription, years (SD)                       | 18.3 (0.6)                                    | 18.3 (0.6)                                            | 18.4 (0.8)                                                  | p < 0.01  |
| Height at conscription, m (SD)                        | 179.5 (6.5)                                   | 179.5 (6.5)                                           | 180.3 (7.2)                                                 | p < 0.05  |
| Weight at conscription, kg (SD)                       | 70.3 (10.4)                                   | 70.3 (10.4)                                           | 71.6 (11.3)                                                 | p < 0.05  |
| BMI at conscription, kg/m <sup>2</sup> (SD)           | 21.8 (2.9)                                    | 21.8 (2.9)                                            | 22.0 (3.1)                                                  | p = ns    |
| BMI in middle age, kg/m <sup>2</sup> (SD)             | 26.1 (5.6)                                    | 26.1 (5.6)                                            | 27.9 (6.1)                                                  | p < 0.001 |
| Systolic blood pressure at conscription, mmHg (SD)    | 128.5 (10.9)                                  | 128.5 (10.9)                                          | 127.5 (10.5)                                                | p = ns    |
| Diastolic blood pressure at conscription, mmHg (SD)   | 67.2 (9.8)                                    | 67.2 (9.8)                                            | 67.4 (9.5)                                                  | p = ns    |
| Age in 2020, years (SD)                               | 52.5 (9.3)                                    | 52.5 (9.3)                                            | 56.1 (8.0)                                                  | p < 0.001 |
| <b>Comorbidities<sup>a</sup>, n (%)</b>               |                                               |                                                       |                                                             |           |
| Any comorbidity                                       | 20028 (13.2)                                  | 19924 (13.2)                                          | 104 (27.6)                                                  | p < 0.001 |
| Coronary heart disease                                | 3586 (2.4)                                    | 3569 (2.4)                                            | 17 (4.5)                                                    | p < 0.05  |
| Heart failure                                         | 867 (0.6)                                     | 861 (0.6)                                             | 6 (1.6)                                                     | p < 0.05  |
| Hypertension                                          | 9223 (6.1)                                    | 9172 (6.1)                                            | 51 (13.5)                                                   | p < 0.001 |
| Diabetes mellitus type 1 <sup>b</sup>                 | 788 (0.5)                                     | 786 (0.5)                                             | 2 (0.5)                                                     | p = ns    |
| Diabetes mellitus type 2 <sup>b</sup>                 | 6049 (4.0)                                    | 6011 (4.0)                                            | 38 (10.1)                                                   | p < 0.001 |
| Cancer                                                | 3991 (2.6)                                    | 3969 (2.6)                                            | 22 (5.8)                                                    | p < 0.001 |
| Chronic obstructive pulmonary disease                 | 1072 (0.7)                                    | 1060 (0.7)                                            | 12 (3.2)                                                    | p < 0.001 |
| Obesity diagnosis                                     | 1473 (1.0)                                    | 1464 (1.0)                                            | 9 (2.4)                                                     | p < 0.05  |
| <b>Outcomes, n (%)</b>                                |                                               |                                                       |                                                             |           |
| Admitted to an ICU <sup>c</sup>                       | 58 (0.04)                                     | 0 (0)                                                 | 58 (15.4)                                                   | p < 0.001 |
| Requiring high-flow nasal oxygen therapy <sup>a</sup> | 79 (0.05)                                     | 0 (0)                                                 | 79 (21.0)                                                   | p < 0.001 |

|                    |           |       |          |           |
|--------------------|-----------|-------|----------|-----------|
| Death <sup>d</sup> | 10 (0.01) | 0 (0) | 10 (2.7) | p < 0.001 |
|--------------------|-----------|-------|----------|-----------|

*SD, standard deviation; BMI, body mass index; ICU, intensive care unit*

<sup>a</sup> Diagnoses received from the National Patient Register.

<sup>b</sup> Diagnoses received from the National Diabetes Register until 2016 and from the National Patient Register from 2016.

<sup>c</sup> Diagnoses received from the Intensive Care Register.

<sup>d</sup> Diagnoses received from the Cause of Death Register.

## Supplemental figures

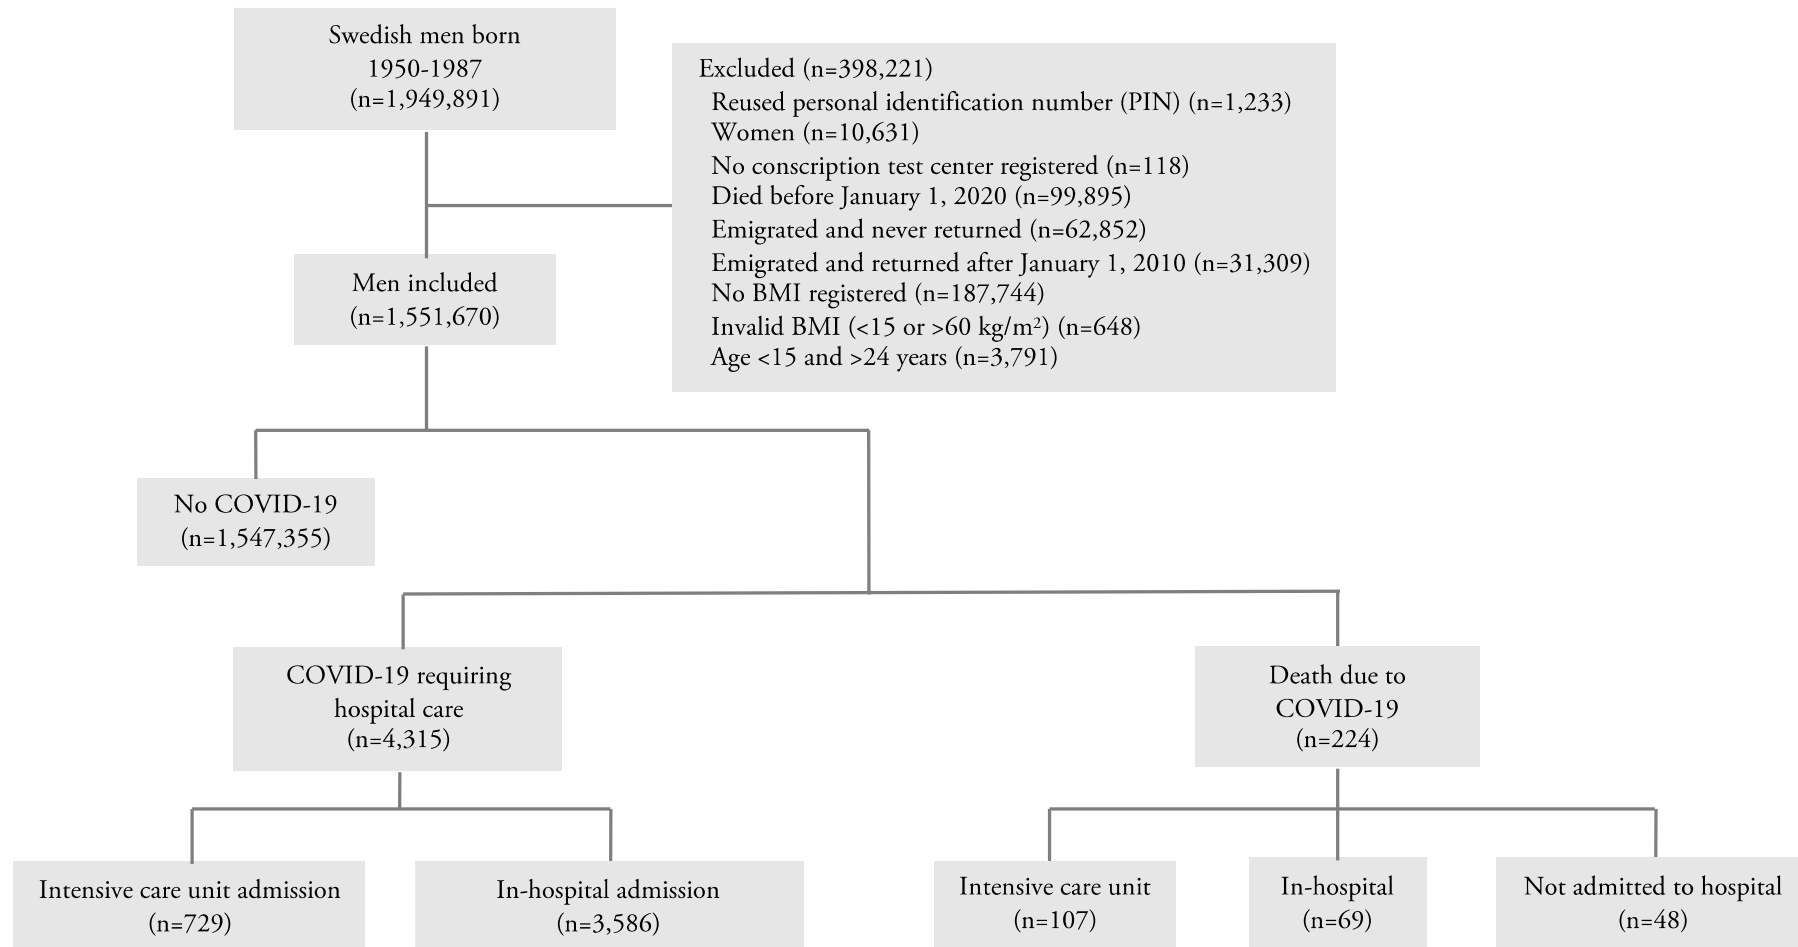

**Figure S1.** Flowchart of included and excluded men.

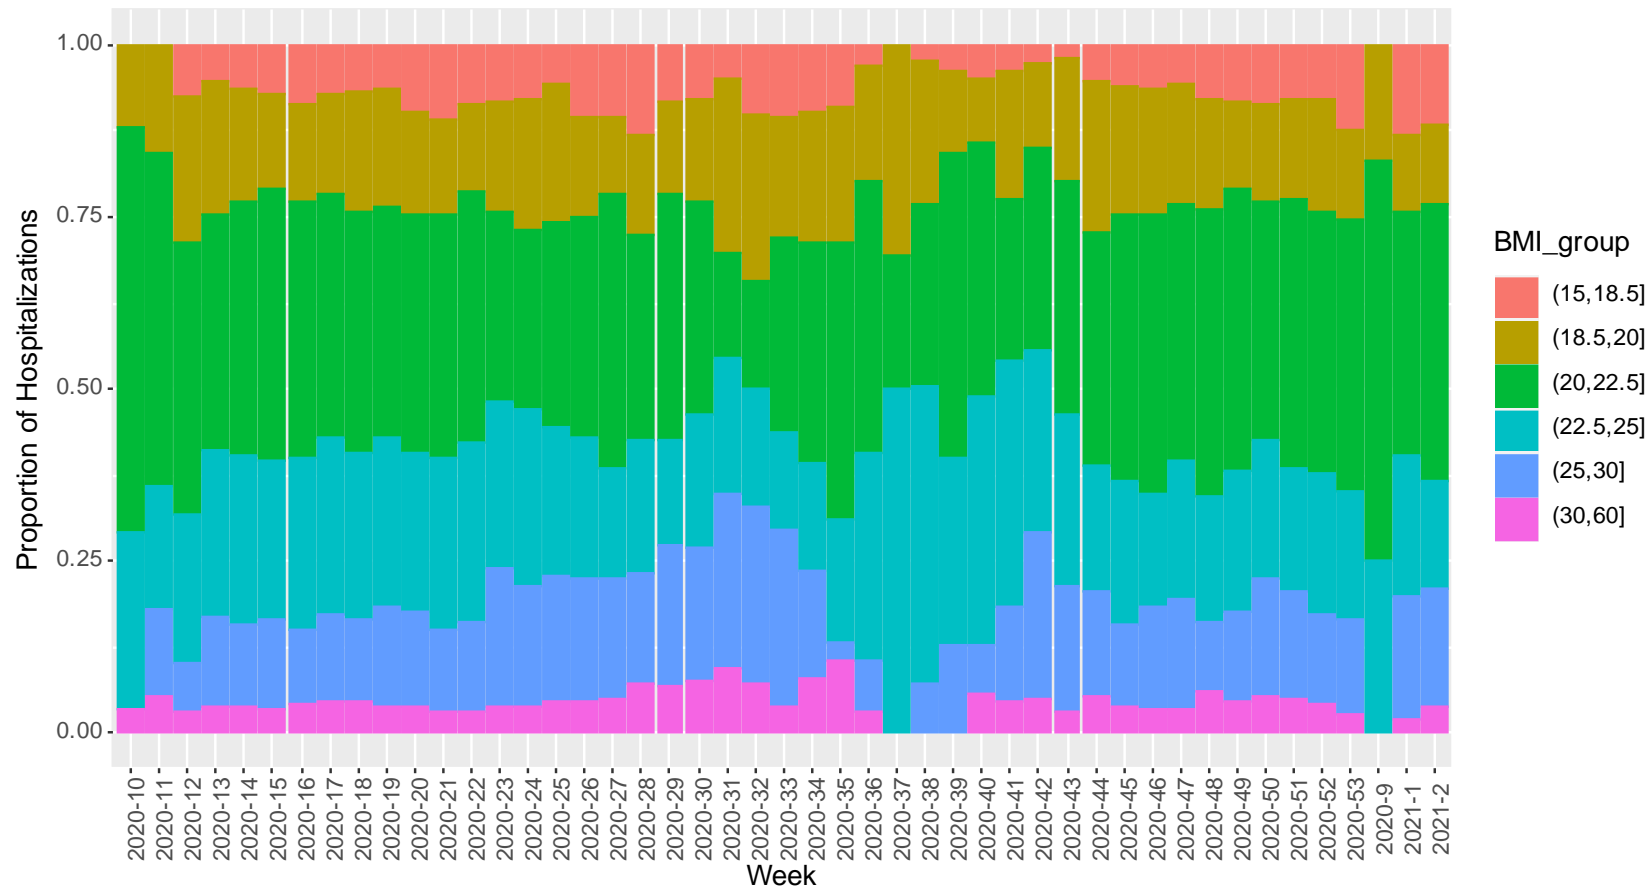

**Figure S2.** Proportions of BMI groups in hospitalized patients with COVID-19 by week during the pandemic in 2020.

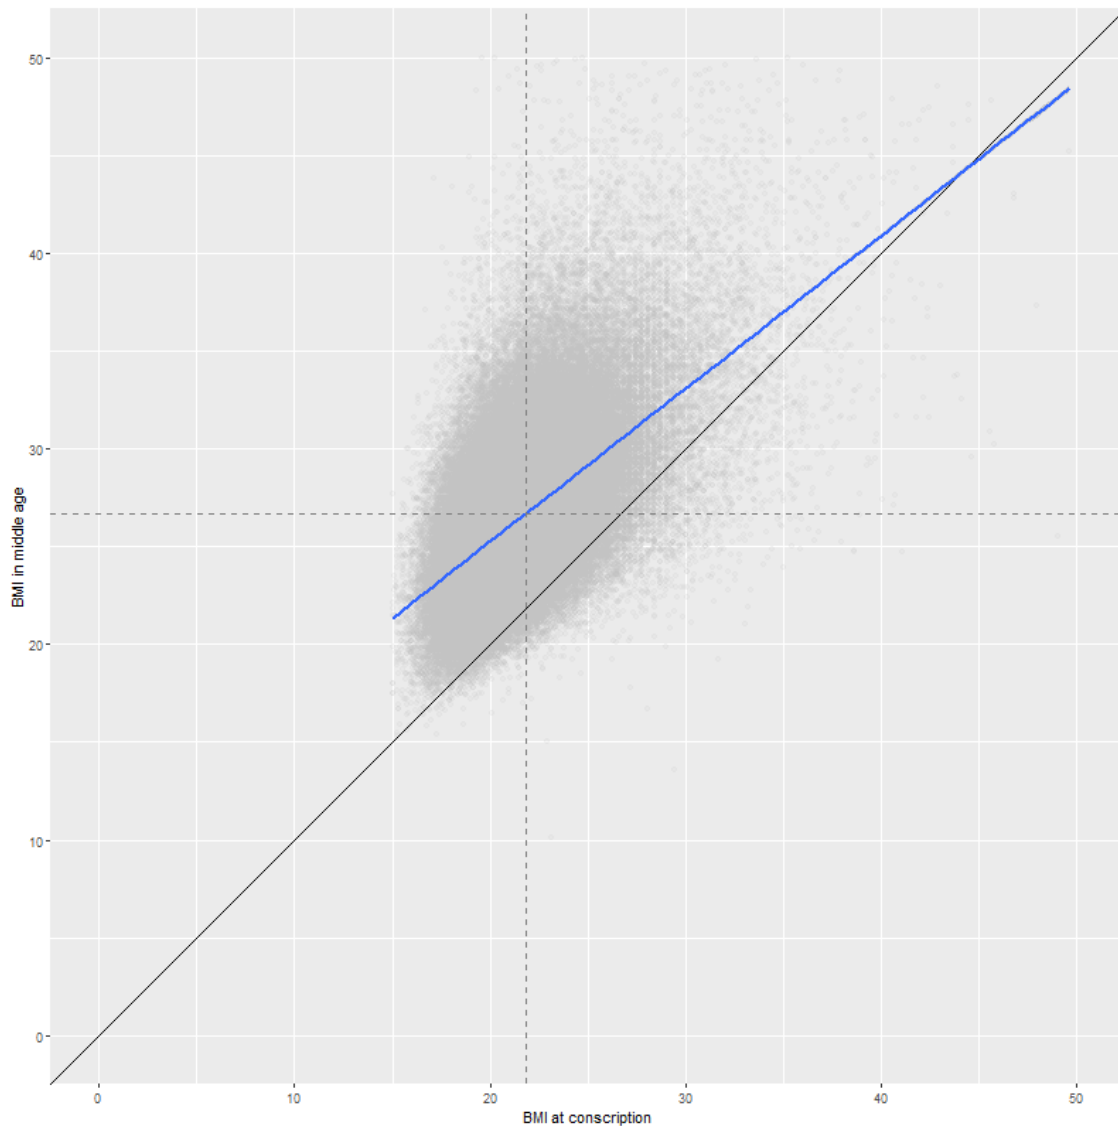

**Figure S3.** Correlation between body mass index (BMI) at conscription [mean age 18.3 (SD 0.6) years] and at measurement in middle age [mean age 45.2 (SD 10.1) years] through the Health Profile Institute (HPI) AB for 151,603 Swedish conscripts. Mean BMI at conscription was 21.8 (2.9) kg/m<sup>2</sup> and in middle age 26.1 (5.6) kg/m<sup>2</sup> (vertical and horizontal dotted lines). The slope of the regression line (blue) was 0.79 indicating that the increase in BMI was lower, on average, in men who were more obese at conscription. Adjusted R<sup>2</sup> was 0.3.
